# Supplementary material for: Active site profiling reveals coupling between domains in SRC-family kinases
Source: Springer Nature journal article supplement (doi:10.1038/nchembio.1118), 2012-11-11
Supplement: 41589_2013_BFnchembio1118_MOESM1_ESM.mol [file 41589_2013_BFnchembio1118_MOESM1_ESM.mol]

  ChemDraw11051207082D

 67 72  0  0  0  0  0  0  0  0999 V2000
   -2.9081   -0.8922    0.0000 C   0  0  0  0  0  0  0  0  0  0  0  0
   -2.9081   -1.7199    0.0000 C   0  0  0  0  0  0  0  0  0  0  0  0
   -2.1912   -2.1338    0.0000 C   0  0  0  0  0  0  0  0  0  0  0  0
   -1.4744   -1.7199    0.0000 C   0  0  0  0  0  0  0  0  0  0  0  0
   -1.4744   -0.8922    0.0000 C   0  0  0  0  0  0  0  0  0  0  0  0
   -2.1912   -0.4783    0.0000 C   0  0  0  0  0  0  0  0  0  0  0  0
   -0.7599   -2.1324    0.0000 C   0  0  0  0  0  0  0  0  0  0  0  0
   -0.0454   -1.7199    0.0000 C   0  0  0  0  0  0  0  0  0  0  0  0
   -0.7599   -2.9574    0.0000 O   0  0  0  0  0  0  0  0  0  0  0  0
    0.6715   -2.1338    0.0000 C   0  0  0  0  0  0  0  0  0  0  0  0
    1.3883   -1.7199    0.0000 C   0  0  0  0  0  0  0  0  0  0  0  0
    1.3883   -0.8922    0.0000 C   0  0  0  0  0  0  0  0  0  0  0  0
    0.6715   -0.4783    0.0000 C   0  0  0  0  0  0  0  0  0  0  0  0
   -0.0454   -0.8922    0.0000 C   0  0  0  0  0  0  0  0  0  0  0  0
   -3.6226   -0.4797    0.0000 O   0  0  0  0  0  0  0  0  0  0  0  0
    2.1028   -0.4797    0.0000 C   0  0  0  0  0  0  0  0  0  0  0  0
   -4.3371   -0.8922    0.0000 C   0  0  0  0  0  0  0  0  0  0  0  0
   -5.0515   -0.4797    0.0000 C   0  0  0  0  0  0  0  0  0  0  0  0
   -5.7660   -0.8922    0.0000 N   0  0  0  0  0  0  0  0  0  0  0  0
   -5.0515    0.3453    0.0000 O   0  0  0  0  0  0  0  0  0  0  0  0
   -6.4805   -0.4797    0.0000 C   0  0  0  0  0  0  0  0  0  0  0  0
   -7.1949   -0.8922    0.0000 C   0  0  0  0  0  0  0  0  0  0  0  0
   -7.9094   -0.4797    0.0000 O   0  0  0  0  0  0  0  0  0  0  0  0
   -8.6239   -0.8922    0.0000 C   0  0  0  0  0  0  0  0  0  0  0  0
   -9.3384   -0.4797    0.0000 C   0  0  0  0  0  0  0  0  0  0  0  0
  -10.0528   -0.8922    0.0000 O   0  0  0  0  0  0  0  0  0  0  0  0
  -10.7673   -0.4797    0.0000 C   0  0  0  0  0  0  0  0  0  0  0  0
  -11.4818   -0.8922    0.0000 C   0  0  0  0  0  0  0  0  0  0  0  0
  -12.1962   -0.4797    0.0000 C   0  0  0  0  0  0  0  0  0  0  0  0
  -12.9107   -0.8922    0.0000 C   0  0  0  0  0  0  0  0  0  0  0  0
  -13.6252   -0.4797    0.0000 C   0  0  0  0  0  0  0  0  0  0  0  0
  -14.3397   -0.8922    0.0000 C   0  0  0  0  0  0  0  0  0  0  0  0
  -15.0541   -0.4797    0.0000 Cl  0  0  0  0  0  0  0  0  0  0  0  0
    2.8173   -0.8922    0.0000 N   0  0  0  0  0  0  0  0  0  0  0  0
    2.1028    0.3453    0.0000 O   0  0  0  0  0  0  0  0  0  0  0  0
    3.5318   -0.4797    0.0000 C   0  0  0  0  0  0  0  0  0  0  0  0
    4.2462   -0.8922    0.0000 C   0  0  0  0  0  0  0  0  0  0  0  0
    4.9607   -0.4797    0.0000 N   0  0  0  0  0  0  0  0  0  0  0  0
    5.6776   -0.8935    0.0000 C   0  0  0  0  0  0  0  0  0  0  0  0
    6.3945   -0.4797    0.0000 C   0  0  0  0  0  0  0  0  0  0  0  0
    6.3945    0.3481    0.0000 N   0  0  0  0  0  0  0  0  0  0  0  0
    5.6776    0.7620    0.0000 C   0  0  0  0  0  0  0  0  0  0  0  0
    4.9607    0.3481    0.0000 C   0  0  0  0  0  0  0  0  0  0  0  0
    7.1089    0.7606    0.0000 C   0  0  0  0  0  0  0  0  0  0  0  0
    7.8258    0.3467    0.0000 C   0  0  0  0  0  0  0  0  0  0  0  0
    8.5427    0.7606    0.0000 C   0  0  0  0  0  0  0  0  0  0  0  0
    8.5427    1.5884    0.0000 N   0  0  0  0  0  0  0  0  0  0  0  0
    7.8258    2.0023    0.0000 C   0  0  0  0  0  0  0  0  0  0  0  0
    7.1089    1.5884    0.0000 N   0  0  0  0  0  0  0  0  0  0  0  0
    7.8258    2.8273    0.0000 C   0  0  0  0  0  0  0  0  0  0  0  0
    9.2572    0.3481    0.0000 N   0  0  0  0  0  0  0  0  0  0  0  0
    9.9716    0.7606    0.0000 C   0  0  0  0  0  0  0  0  0  0  0  0
   10.7278    0.4239    0.0000 S   0  0  0  0  0  0  0  0  0  0  0  0
   11.2817    1.0391    0.0000 C   0  0  0  0  0  0  0  0  0  0  0  0
   10.8679    1.7560    0.0000 C   0  0  0  0  0  0  0  0  0  0  0  0
   10.0582    1.5839    0.0000 N   0  0  0  0  0  0  0  0  0  0  0  0
   12.1022    0.9529    0.0000 C   0  0  0  0  0  0  0  0  0  0  0  0
   12.5871    1.6203    0.0000 N   0  0  0  0  0  0  0  0  0  0  0  0
   12.4378    0.1992    0.0000 O   0  0  0  0  0  0  0  0  0  0  0  0
   13.4076    1.5341    0.0000 C   0  0  0  0  0  0  0  0  0  0  0  0
   13.7443    0.7779    0.0000 C   0  0  0  0  0  0  0  0  0  0  0  0
   14.5676    0.6913    0.0000 C   0  0  0  0  0  0  0  0  0  0  0  0
   15.0541    1.3610    0.0000 C   0  0  0  0  0  0  0  0  0  0  0  0
   14.7174    2.1172    0.0000 C   0  0  0  0  0  0  0  0  0  0  0  0
   13.8942    2.2038    0.0000 C   0  0  0  0  0  0  0  0  0  0  0  0
   13.5586    2.9574    0.0000 Cl  0  0  0  0  0  0  0  0  0  0  0  0
   13.2594    0.1104    0.0000 C   0  0  0  0  0  0  0  0  0  0  0  0
  1  2  2  0      
  2  3  1  0      
  3  4  2  0      
  4  5  1  0      
  5  6  2  0      
  6  1  1  0      
  4  7  1  0      
  7  8  1  0      
  7  9  2  0      
  8 10  2  0      
 10 11  1  0      
 11 12  2  0      
 12 13  1  0      
 13 14  2  0      
 14  8  1  0      
  1 15  1  0      
 12 16  1  0      
 15 17  1  0      
 17 18  1  0      
 18 19  1  0      
 18 20  2  0      
 19 21  1  0      
 21 22  1  0      
 22 23  1  0      
 23 24  1  0      
 24 25  1  0      
 25 26  1  0      
 26 27  1  0      
 27 28  1  0      
 28 29  1  0      
 29 30  1  0      
 30 31  1  0      
 31 32  1  0      
 32 33  1  0      
 16 34  1  0      
 16 35  2  0      
 34 36  1  0      
 36 37  1  0      
 37 38  1  0      
 38 39  1  0      
 39 40  1  0      
 40 41  1  0      
 41 42  1  0      
 42 43  1  0      
 43 38  1  0      
 41 44  1  0      
 44 45  2  0      
 45 46  1  0      
 46 47  2  0      
 47 48  1  0      
 48 49  2  0      
 49 44  1  0      
 48 50  1  0      
 46 51  1  0      
 51 52  1  0      
 52 53  1  0      
 53 54  1  0      
 54 55  2  0      
 55 56  1  0      
 56 52  2  0      
 54 57  1  0      
 57 58  1  0      
 57 59  2  0      
 58 60  1  0      
 60 61  2  0      
 61 62  1  0      
 62 63  2  0      
 63 64  1  0      
 64 65  2  0      
 65 60  1  0      
 65 66  1  0      
 61 67  1  0      
M  END
